# Supplementary material for: Exploring the Best-Matching Plant Traits and Environmental Factors for Vegetation Indices in Estimates of Global Gross Primary Productivity
Source: MDPI journal article supplement (doi:10.3390/rs14246316), 2022-12-13
Supplement: s1 [file s1]

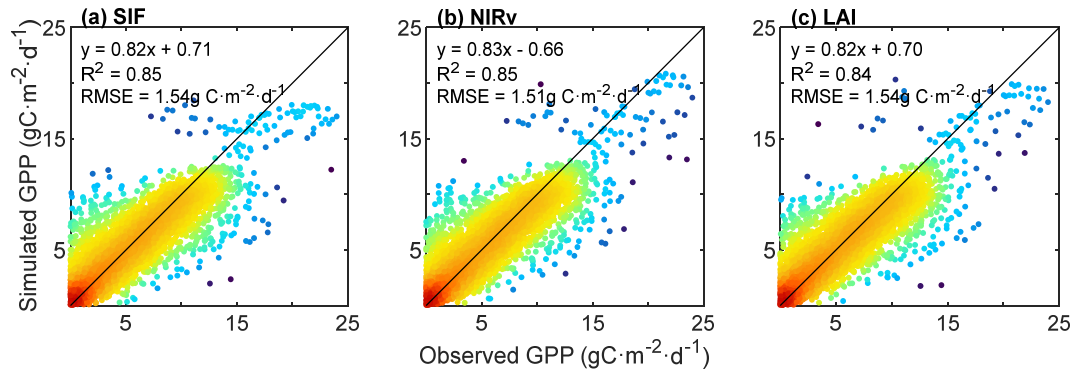

**Figure S1.** Evaluation of the simulated GPP against flux tower measurements. The predictions were based on the universal models using the Random Forest (RF) method.

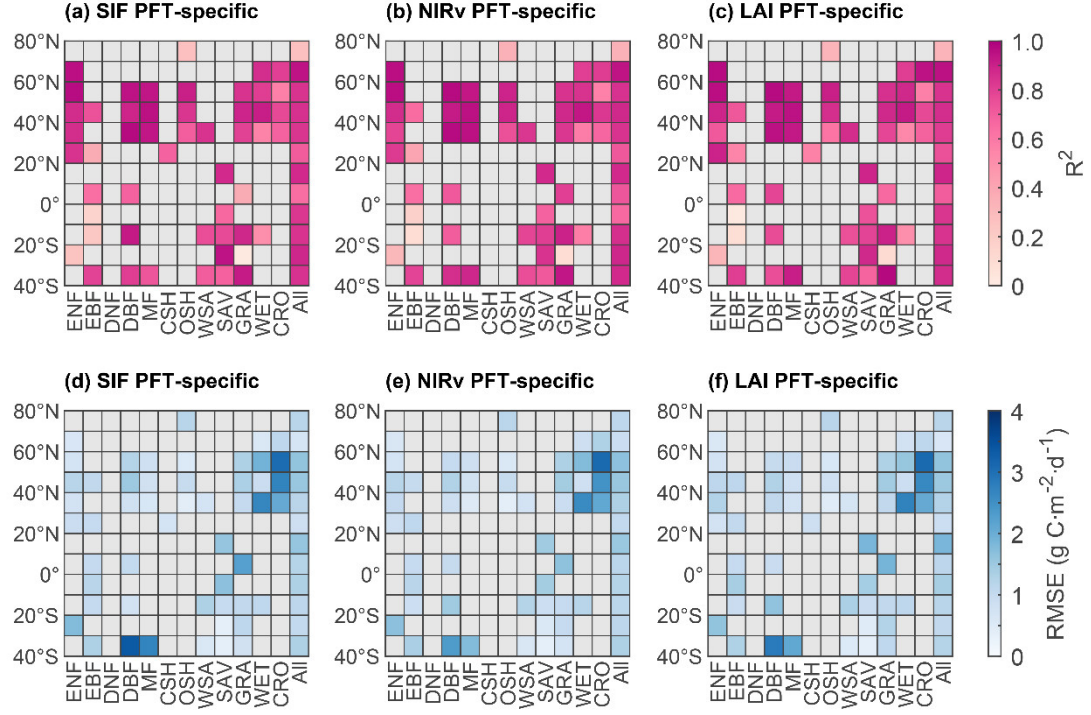

**Figure S2.** PFT-specific models performance for each PFT along latitude gradient using the RF method. (a)-(c) The  $R^2$  of universal models that each vegetation index used as one of the model predictors. (d)-(f) The RMSE of universal models that each vegetation index used as one of the model predictors. The gray squares represent that there is no flux tower for the corresponding PFT and latitudinal bands.

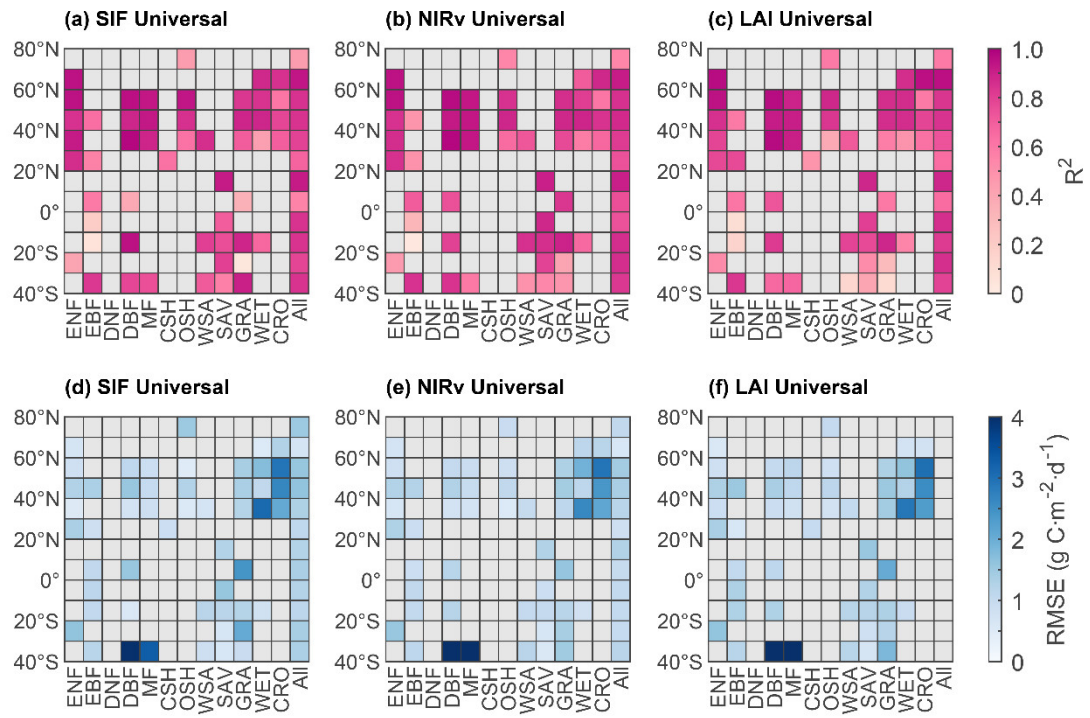

**Figure S3.** Universal models performance for each PFT along latitude gradient using the Back Propagation Neural Network (BPNN) method. (a)-(c) The  $R^2$  of universal models that each vegetation index used as one of the model predictors. (d)-(f) The RMSE of universal models that each vegetation index used as one of the model predictors. The gray squares represent that there is no flux tower for the corresponding PFT and latitudinal bands.

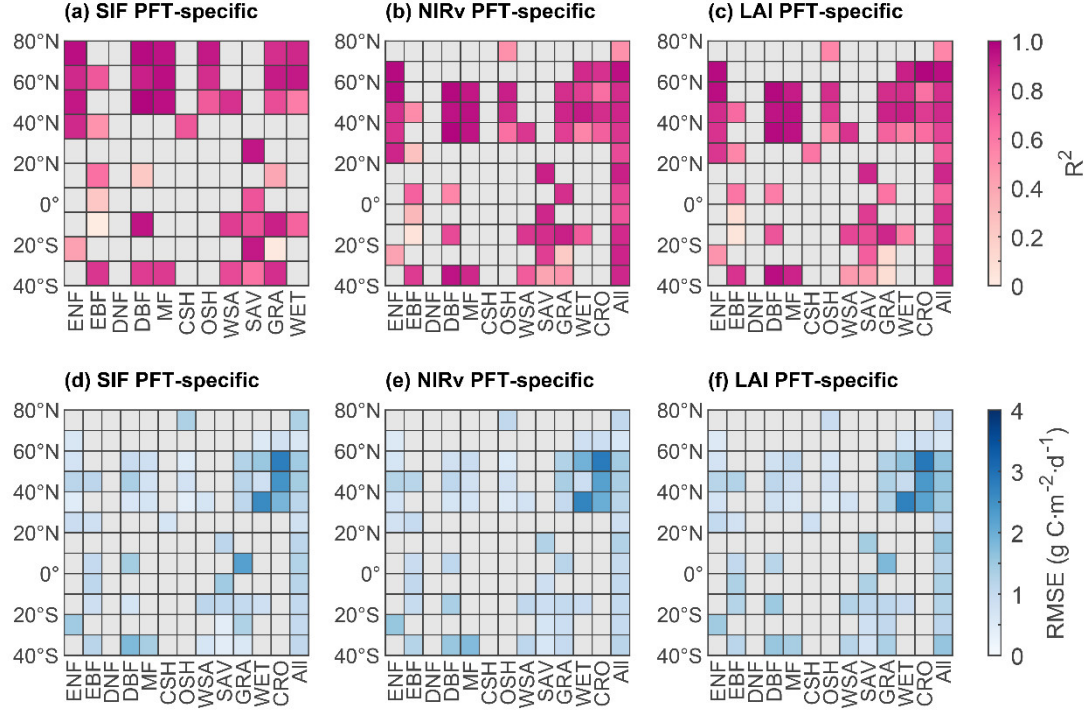

**Figure S4.** PFT-Specific models performance for each PFT along latitude gradient using the BPNN method. (a)-(c) The  $R^2$  of universal models that each vegetation index used as one of the model predictors. (d)-(f) The RMSE of universal models that each vegetation index used as one of the model predictors. The gray squares represent that there is no flux tower for the corresponding PFT and latitudinal bands.

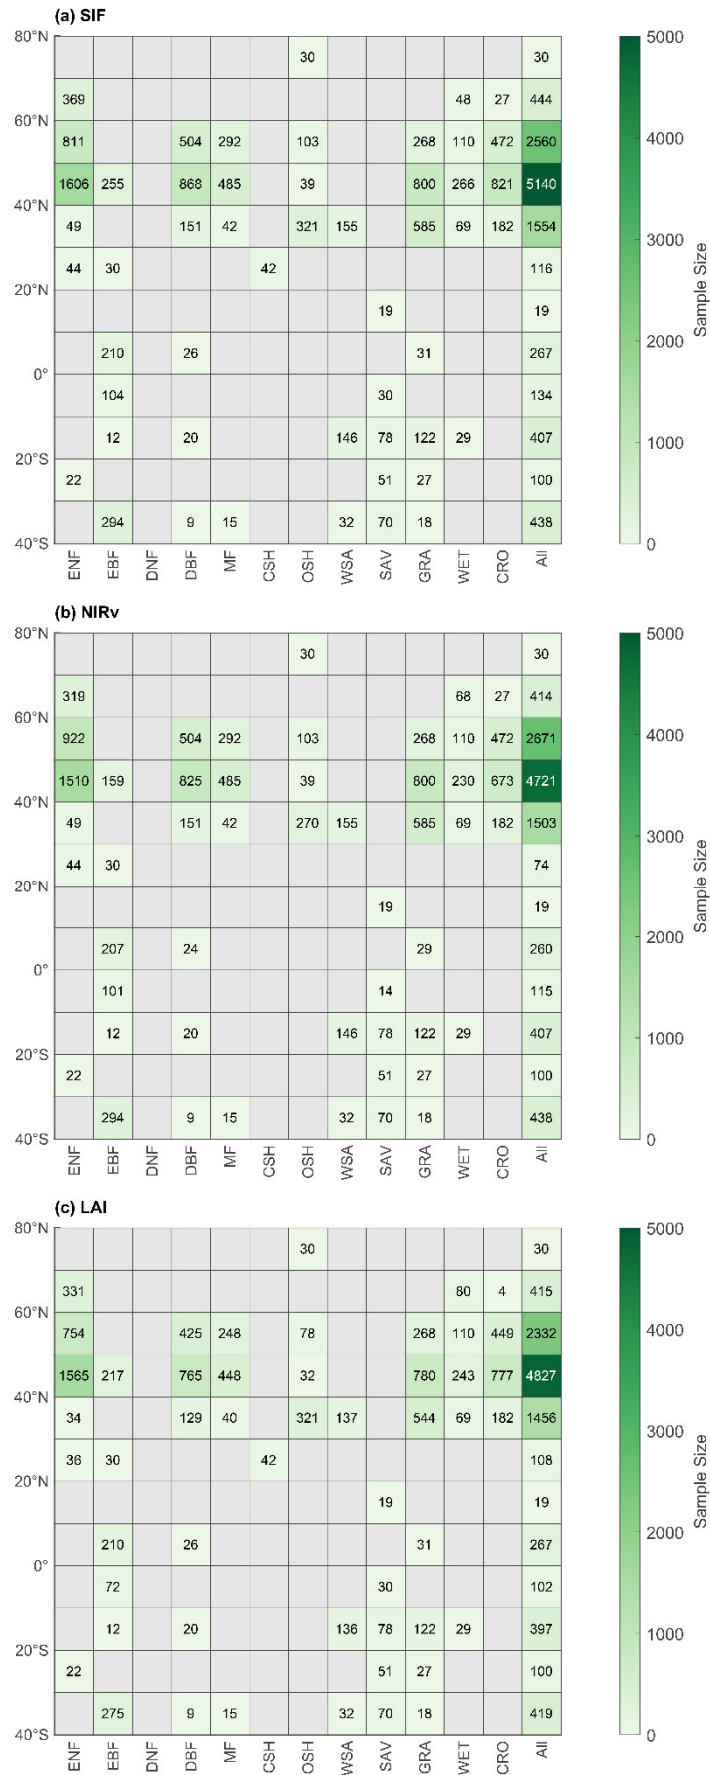

**Figure S5.** The sample size for each PFT along latitude gradient.

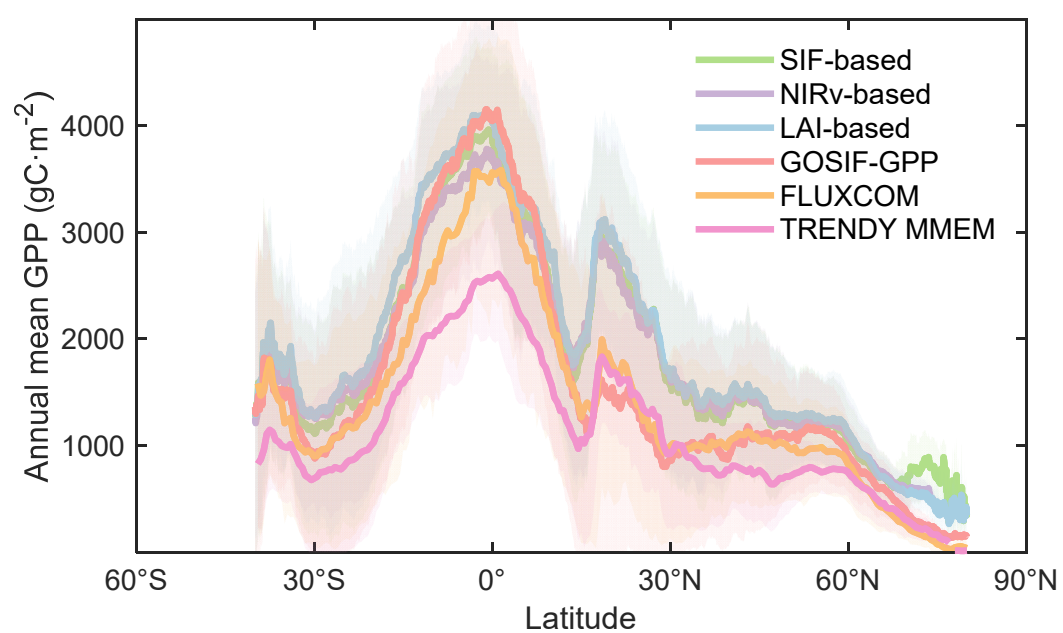

**Figure S6.** Latitudinal profiles of annual mean GPP during 2003-2018. The shaded areas represent the standard deviations of the GPP.

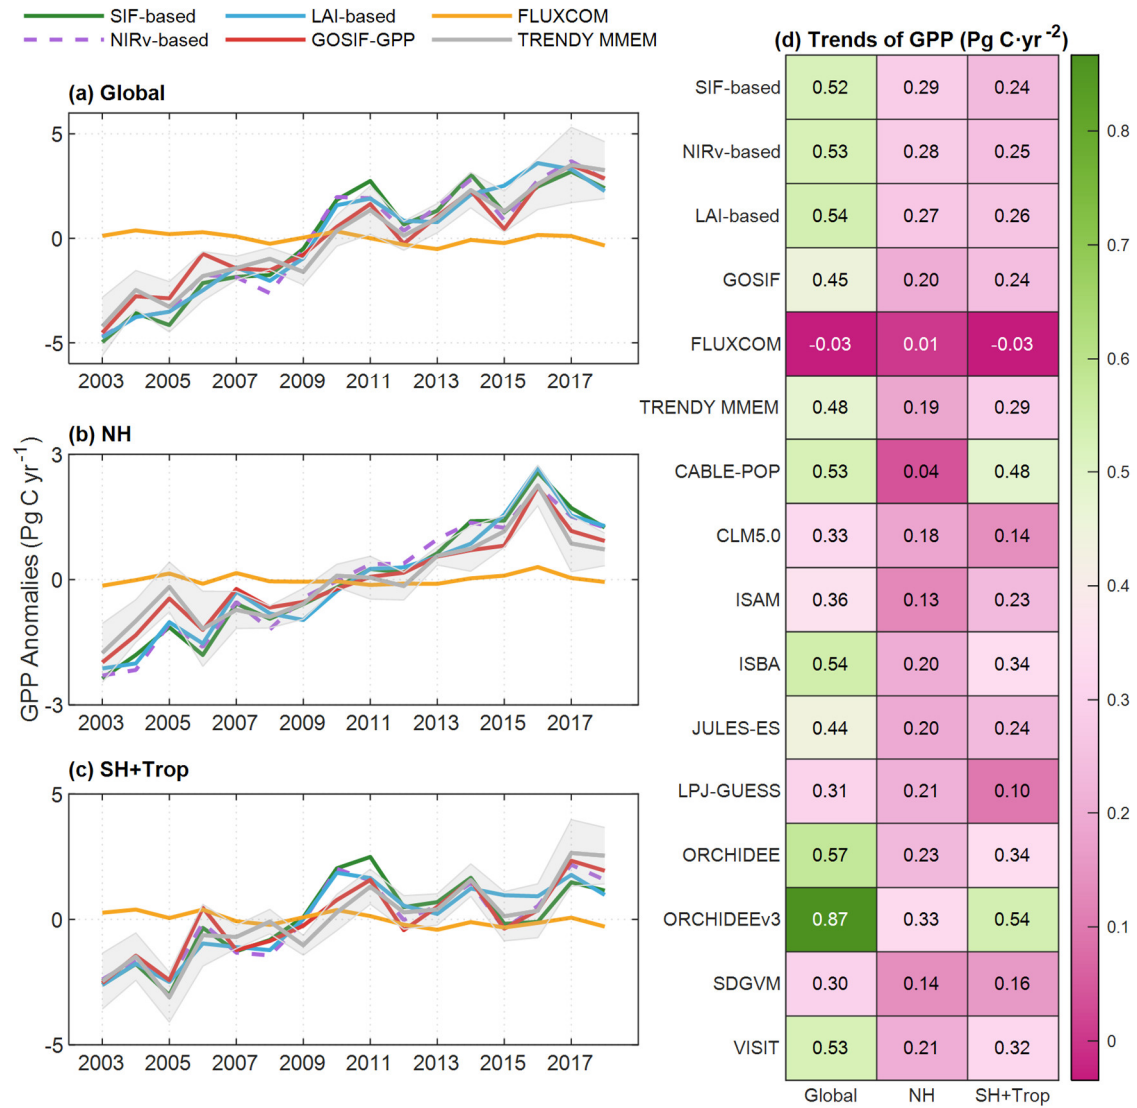

**Figure S7.** Interannual variability and trends for the period of 2003-2018. (a-c) Interannual changes in anomalies of GPP. The global land is divided into the northern hemisphere (NH: 30°N–90°N) and the tropical and southern hemisphere (SH+Trop: 90°S–30°N). SIF-based (green), NIRv-based (blue), and LAI-based (orange) represent the universal models constructed in this study using random forest based on three VIs (i.e., SIF, NIRv, and LAI), respectively. TRENDY MMEM (gray) represents the average of the multi-model ensemble mean. The shaded areas represent the standard deviations (SD) of the ten processed models in the TRENDY group. (d) Global and regional GPP trends in individual models and products.

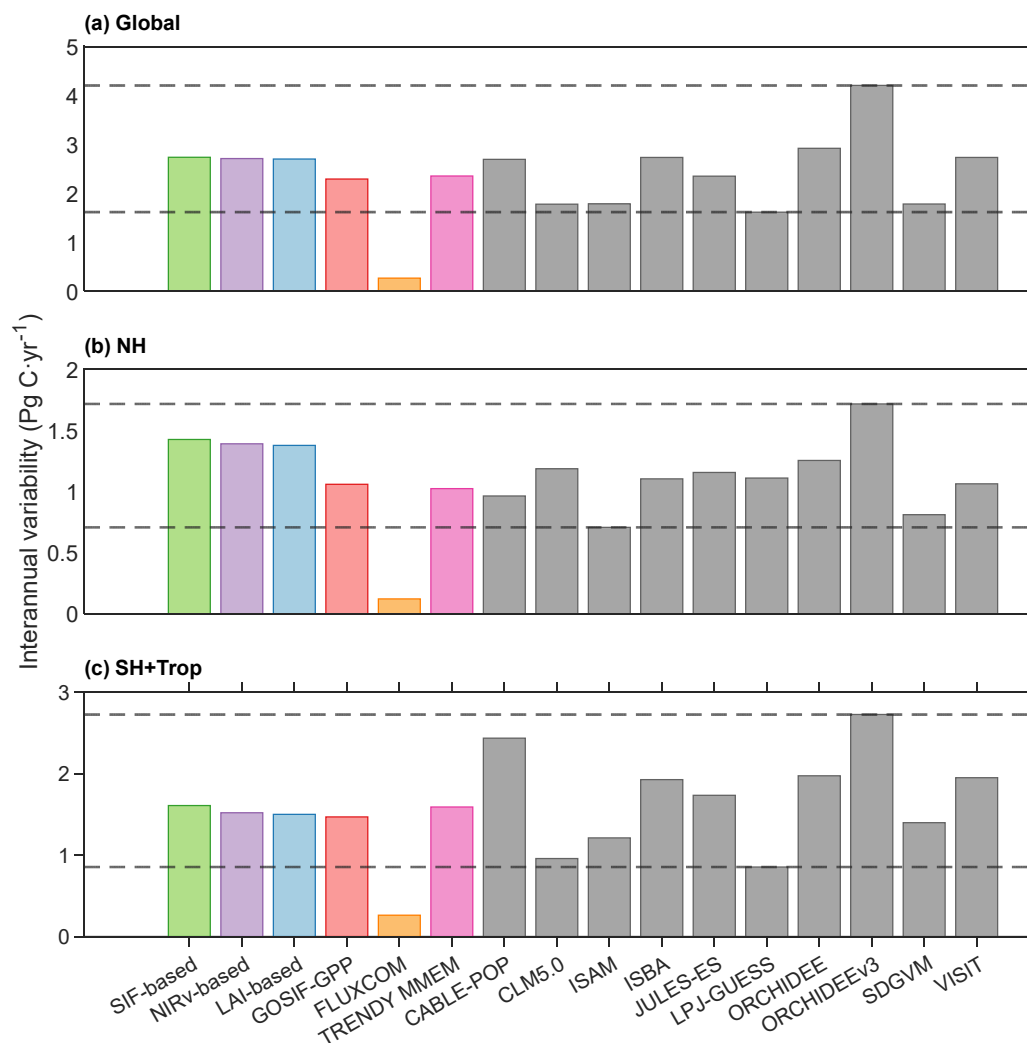

**Figure S8.** Comparisons of the interannual variability of GPP among different GPP products. The global land is divided into the northern hemisphere (NH: 30°N–90°N) and the tropical plus southern hemisphere (SH+Trop: 90°S–30°N). SIF-based, NIRv-based, and LAI-based represent the universal models constructed in this study using random forest based on three VIs (i.e., SIF, NIRv, and LAI), respectively. The dashed lines represent the maximum and minimum values of the ten processed models in the TRENDY group ('S3' scenarios). TRENDY MMEM represents the average of the multi-model ensemble mean.



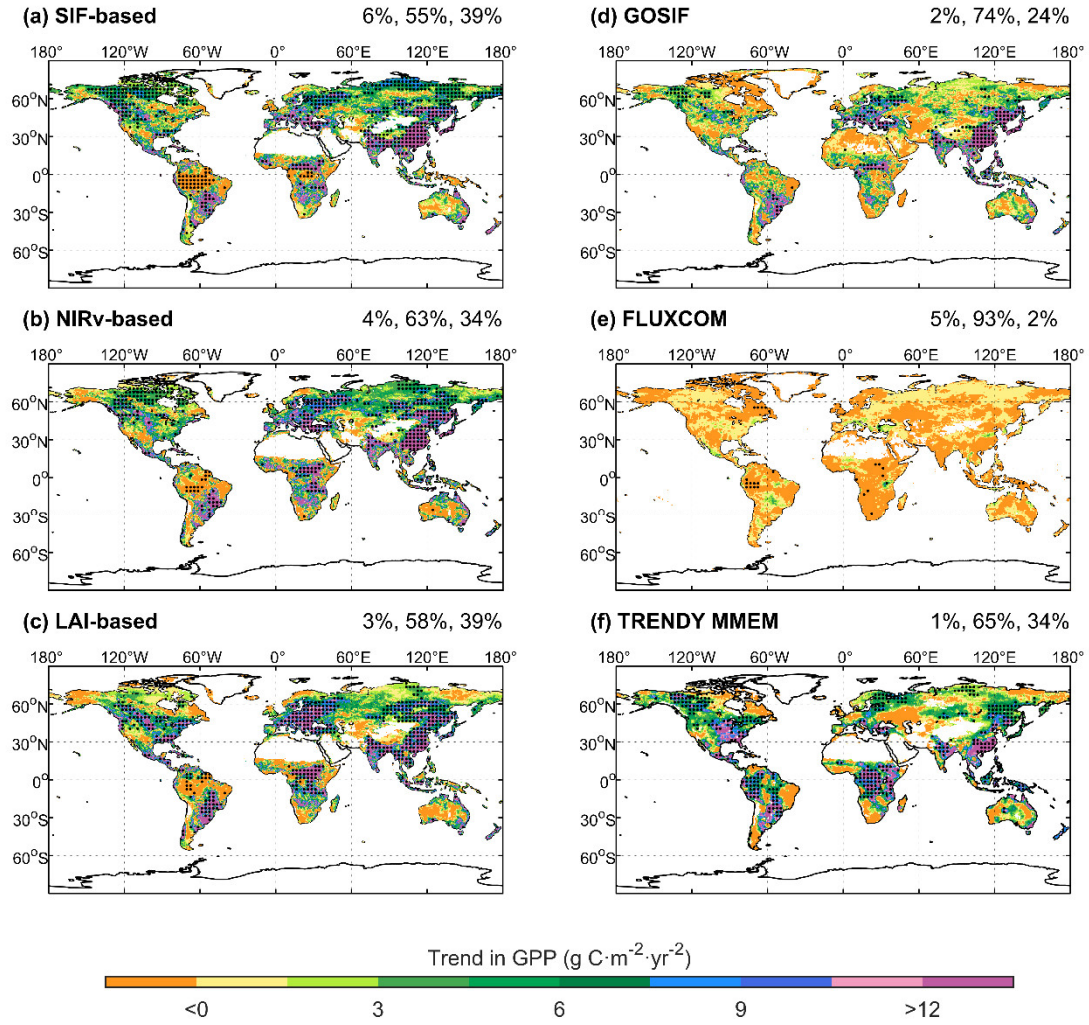

**Figure S9.** Spatial patterns of global GPP trends during 2003-2019. Black dots indicate trends that are statistically significant (Mann-Kendall test;  $p < 0.05$ ). The three numbers at the top of each subplot represent the percentages of the area with significant negative trends, insignificant trends, and significant positive trends in the global vegetated lands.

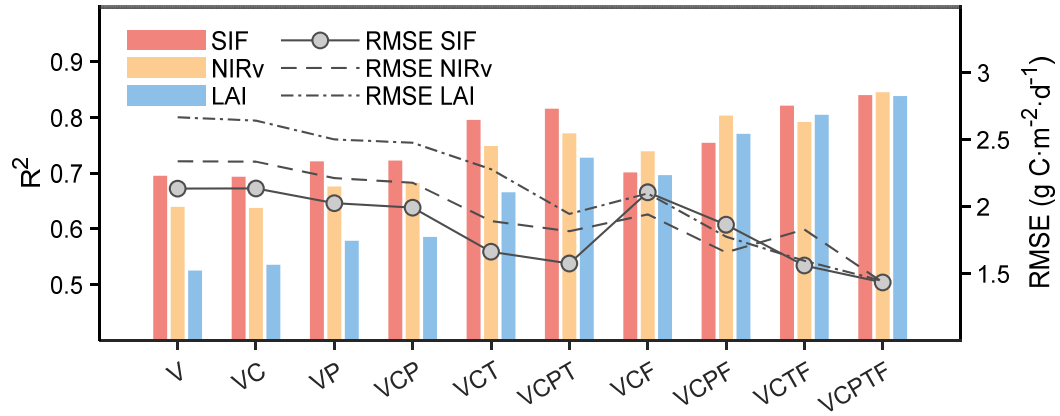

**Figure S10.** The performance of BPNN models using different combinations of predictors. The hyperparameters of the models using other combinations of inputs were consistent with the optimal model. The left and right axes respectively represent the mean predicted  $R^2$  and RMSE of the models repeated 50 times, with negligible differences each time. The variables used to develop the GPP estimation models were represented by the combination of their abbreviations, i.e., VIs (V),  $\text{CO}_2$  (C), PFT (P), plant traits (T), and climate factors (F) (Table S2). For example, ‘VCT’ denotes the RF GPP model that used VIs,  $\text{CO}_2$ , and plant traits as input.

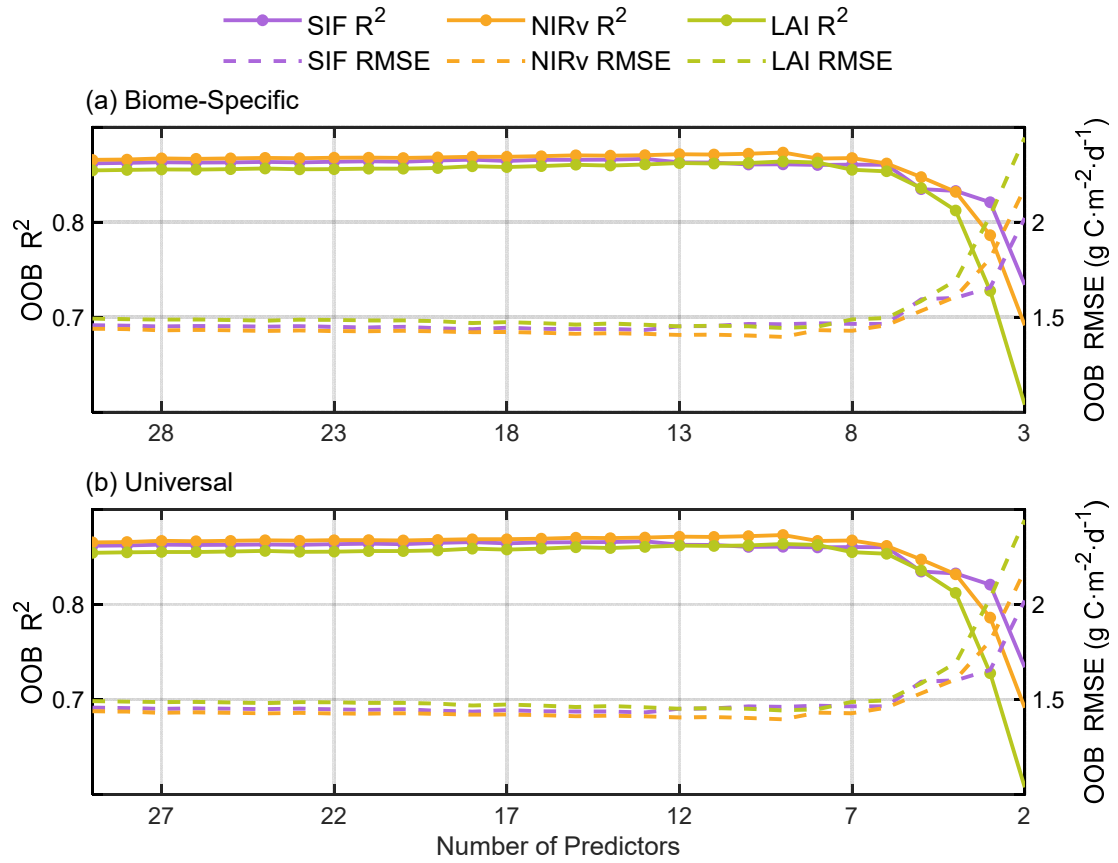

**Figure S11.** The relationship between the number of features selected and the performance of the random forest models. (a) PFT-specific models. (b) Universal models that the PFT is not considered. All solid lines represent the Out-Of-Bag (OOB)  $R^2$  of models, and dashed lines represent the OOB RMSE of models.

**Table S1.** FLUXNET2015 Tier1 sites used in this study. ENF: evergreen needleleaf forests, EBF: evergreen broadleaf forests, DNF: deciduous needleleaf forests, DBF: deciduous broadleaf forests, MF: mixed forests, OSH: open shrublands, WSA: woody savannas, SAV: savannas, GRA: grasslands, CRO: croplands, and WET: wetlands.

| Site ID | IGBP | Temporal coverage | Latitude (°) | Longitude (°) |
|---------|------|-------------------|--------------|---------------|
| AR-SLu  | MF   | 2009-2011         | -33.46       | -66.46        |
| AR-Vir  | ENF  | 2009-2012         | -28.24       | -56.19        |
| AT-Neu  | GRA  | 2002-2012         | 47.12        | 11.32         |
| AU-ASM  | SAV  | 2010-2014         | -22.28       | 133.25        |
| AU-Cpr  | SAV  | 2010-2014         | -34.00       | 140.59        |
| AU-Cum  | EBF  | 2012-2014         | -33.62       | 150.72        |
| AU-DaP  | GRA  | 2007-2013         | -14.06       | 131.32        |
| AU-DaS  | SAV  | 2008-2014         | -14.16       | 131.39        |
| AU-Emr  | GRA  | 2011-2013         | -23.86       | 148.47        |
| AU-Fog  | WET  | 2006-2008         | -12.55       | 131.31        |
| AU-Gin  | WSA  | 2011-2014         | -31.38       | 115.71        |
| AU-GWW  | SAV  | 2013-2014         | -30.19       | 120.65        |
| AU-How  | WSA  | 2001-2014         | -12.49       | 131.15        |
| AU-Lox  | DBF  | 2008-2009         | -34.47       | 140.66        |
| AU-RDF  | WSA  | 2011-2013         | -14.56       | 132.48        |
| AU-Rob  | EBF  | 2014-2014         | -17.12       | 145.63        |
| AU-Stp  | GRA  | 2008-2014         | -17.15       | 133.35        |
| AU-Tum  | EBF  | 2001-2014         | -35.66       | 148.15        |
| AU-Wac  | EBF  | 2005-2008         | -37.43       | 145.19        |
| AU-Whr  | EBF  | 2011-2014         | -36.67       | 145.03        |
| AU-Wom  | EBF  | 2010-2014         | -37.42       | 144.09        |
| AU-Ync  | GRA  | 2012-2014         | -34.99       | 146.29        |
| BE-Bra  | MF   | 1996-2014         | 51.31        | 4.52          |
| BE-Lon  | CRO  | 2004-2014         | 50.55        | 4.75          |
| BE-Vie  | MF   | 1996-2014         | 50.30        | 6.00          |
| BR-Sa1  | EBF  | 2002-2011         | -2.86        | -54.96        |
| BR-Sa3  | EBF  | 2000-2004         | -3.02        | -54.97        |
| CA-Gro  | MF   | 2003-2014         | 48.22        | -82.16        |
| CA-Man  | ENF  | 1994-2008         | 55.88        | -98.48        |
| CA-NS1  | ENF  | 2001-2005         | 55.88        | -98.48        |
| CA-NS2  | ENF  | 2001-2005         | 55.91        | -98.52        |
| CA-NS3  | ENF  | 2001-2005         | 55.91        | -98.38        |
| CA-NS4  | ENF  | 2002-2005         | 55.91        | -98.38        |
| CA-NS5  | ENF  | 2001-2005         | 55.86        | -98.49        |
| CA-NS6  | OSH  | 2001-2005         | 55.92        | -98.96        |
| CA-NS7  | OSH  | 2002-2005         | 56.64        | -99.95        |

|        |     |           |       |         |
|--------|-----|-----------|-------|---------|
| CA-Oas | DBF | 1996-2010 | 53.63 | -106.20 |
| CA-Obs | ENF | 1997-2010 | 53.99 | -105.12 |
| CA-Qfo | ENF | 2003-2010 | 49.69 | -74.34  |
| CA-SF1 | ENF | 2003-2006 | 54.49 | -105.82 |
| CA-SF2 | ENF | 2001-2005 | 54.25 | -105.88 |
| CA-SF3 | OSH | 2001-2006 | 54.09 | -106.01 |
| CA-TP1 | ENF | 2002-2014 | 42.66 | -80.56  |
| CA-TP2 | ENF | 2002-2007 | 42.77 | -80.46  |
| CA-TP3 | ENF | 2002-2014 | 42.71 | -80.35  |
| CA-TP4 | ENF | 2002-2014 | 42.71 | -80.36  |
| CA-TPD | DBF | 2012-2014 | 42.64 | -80.56  |
| CG-Tch | SAV | 2006-2009 | -4.29 | 11.66   |
| CH-Cha | GRA | 2005-2014 | 47.21 | 8.41    |
| CH-Dav | ENF | 1997-2014 | 46.82 | 9.86    |
| CH-Fru | GRA | 2005-2014 | 47.12 | 8.54    |
| CH-Lae | MF  | 2004-2014 | 47.48 | 8.36    |
| CH-Oe1 | GRA | 2002-2008 | 47.29 | 7.73    |
| CH-Oe2 | CRO | 2004-2014 | 47.29 | 7.73    |
| CN-Cha | MF  | 2003-2005 | 42.40 | 128.10  |
| CN-Cng | GRA | 2007-2010 | 44.59 | 123.51  |
| CN-Dan | GRA | 2004-2005 | 30.50 | 91.07   |
| CN-Din | EBF | 2003-2005 | 23.17 | 112.54  |
| CN-Du2 | GRA | 2006-2008 | 42.05 | 116.28  |
| CN-Du3 | GRA | 2009-2010 | 42.06 | 116.28  |
| CN-HaM | GRA | 2002-2004 | 37.37 | 101.18  |
| CN-Qia | ENF | 2003-2005 | 26.74 | 115.06  |
| CZ-BK1 | ENF | 2004-2014 | 49.50 | 18.54   |
| CZ-BK2 | GRA | 2004-2012 | 49.49 | 18.54   |
| CZ-wet | WET | 2006-2014 | 49.02 | 14.77   |
| DE-Akm | WET | 2009-2014 | 53.87 | 13.68   |
| DE-Geb | CRO | 2001-2014 | 51.10 | 10.91   |
| DE-Gri | GRA | 2004-2014 | 50.95 | 13.51   |
| DE-Hai | DBF | 2000-2012 | 51.08 | 10.45   |
| DE-Kli | CRO | 2004-2014 | 50.89 | 13.52   |
| DE-Lkb | ENF | 2009-2013 | 49.10 | 13.30   |
| DE-Lnf | DBF | 2002-2012 | 51.33 | 10.37   |
| DE-Obe | ENF | 2008-2014 | 50.79 | 13.72   |
| DE-RuR | GRA | 2011-2014 | 50.62 | 6.30    |
| DE-RuS | CRO | 2011-2014 | 50.87 | 6.45    |
| DE-Seh | CRO | 2007-2010 | 50.87 | 6.45    |
| DE-SfN | WET | 2012-2014 | 47.81 | 11.33   |
| DE-Spw | WET | 2010-2014 | 51.89 | 14.03   |
| DE-Tha | ENF | 1996-2014 | 50.96 | 13.57   |
| DE-Zrk | WET | 2013-2014 | 53.88 | 12.89   |

|        |     |           |       |        |
|--------|-----|-----------|-------|--------|
| DK-Eng | GRA | 2005-2008 | 55.69 | 12.19  |
| DK-Fou | CRO | 2005-2005 | 56.48 | 9.59   |
| DK-Sor | DBF | 1996-2014 | 55.49 | 11.64  |
| ES-Amo | OSH | 2007-2012 | 36.83 | -2.25  |
| ES-LgS | OSH | 2007-2009 | 37.10 | -2.97  |
| ES-LJu | OSH | 2004-2013 | 36.93 | -2.75  |
| ES-Ln2 | OSH | 2009-2009 | 36.97 | -3.48  |
| FI-Hyy | ENF | 1996-2014 | 61.85 | 24.29  |
| FI-Jok | CRO | 2000-2003 | 60.90 | 23.51  |
| FI-Let | ENF | 2009-2012 | 60.64 | 23.96  |
| FI-Lom | WET | 2007-2009 | 68.00 | 24.21  |
| FI-Sod | ENF | 2001-2014 | 67.36 | 26.64  |
| FR-Fon | DBF | 2005-2014 | 48.48 | 2.78   |
| FR-Gri | CRO | 2004-2014 | 48.84 | 1.95   |
| FR-LBr | ENF | 1996-2008 | 44.72 | -0.77  |
| FR-Pue | EBF | 2000-2014 | 43.74 | 3.60   |
| GF-Guy | EBF | 2004-2014 | 5.28  | -52.92 |
| GH-Ank | EBF | 2011-2014 | 5.27  | -2.69  |
| IT-BCi | CRO | 2004-2014 | 40.52 | 14.96  |
| IT-CA1 | DBF | 2011-2014 | 42.38 | 12.03  |
| IT-CA2 | CRO | 2011-2014 | 42.38 | 12.03  |
| IT-CA3 | DBF | 2011-2014 | 42.38 | 12.02  |
| IT-Col | DBF | 1996-2014 | 41.85 | 13.59  |
| IT-Cp2 | EBF | 2012-2014 | 41.70 | 12.36  |
| IT-Cpz | EBF | 1997-2009 | 41.71 | 12.38  |
| IT-Isp | DBF | 2013-2014 | 45.81 | 8.63   |
| IT-La2 | ENF | 2000-2002 | 45.95 | 11.29  |
| IT-Lav | ENF | 2003-2014 | 45.96 | 11.28  |
| IT-MBo | GRA | 2003-2013 | 46.01 | 11.05  |
| IT-PT1 | DBF | 2002-2004 | 45.20 | 9.06   |
| IT-Ren | ENF | 1998-2013 | 46.59 | 11.43  |
| IT-Ro1 | DBF | 2000-2008 | 42.41 | 11.93  |
| IT-Ro2 | DBF | 2002-2012 | 42.39 | 11.92  |
| IT-SR2 | ENF | 2013-2014 | 43.73 | 10.29  |
| IT-SRo | ENF | 1999-2012 | 43.73 | 10.28  |
| IT-Tor | GRA | 2008-2014 | 45.84 | 7.58   |
| JP-MBF | DBF | 2003-2005 | 44.39 | 142.32 |
| JP-SMF | MF  | 2002-2006 | 35.26 | 137.08 |
| MY-PSO | EBF | 2003-2009 | 2.97  | 102.31 |
| NL-Hor | GRA | 2004-2011 | 52.24 | 5.07   |
| NL-Loo | ENF | 1996-2014 | 52.17 | 5.74   |
| PA-SPn | DBF | 2007-2009 | 9.32  | -79.63 |
| PA-SPs | GRA | 2007-2009 | 9.31  | -79.63 |
| RU-Che | WET | 2002-2005 | 68.61 | 161.34 |

|        |     |           |       |         |
|--------|-----|-----------|-------|---------|
| RU-Cok | OSH | 2003-2014 | 70.83 | 147.49  |
| RU-Fyo | ENF | 1998-2014 | 56.46 | 32.92   |
| SN-Dhr | SAV | 2010-2013 | 15.40 | -15.43  |
| US-AR1 | GRA | 2009-2012 | 36.43 | -99.42  |
| US-AR2 | GRA | 2009-2012 | 36.64 | -99.60  |
| US-ARb | GRA | 2005-2006 | 35.55 | -98.04  |
| US-ARc | GRA | 2005-2006 | 35.55 | -98.04  |
| US-ARM | CRO | 2003-2012 | 36.61 | -97.49  |
| US-Blo | ENF | 1997-2007 | 38.90 | -120.63 |
| US-CRT | CRO | 2011-2013 | 41.63 | -83.35  |
| US-GBT | ENF | 1999-2006 | 41.37 | -106.24 |
| US-GLE | ENF | 2004-2014 | 41.37 | -106.24 |
| US-Goo | GRA | 2002-2006 | 34.25 | -89.87  |
| US-Ha1 | DBF | 1991-2012 | 42.54 | -72.17  |
| US-IB2 | GRA | 2004-2011 | 41.84 | -88.24  |
| US-Ivo | WET | 2004-2007 | 68.49 | -155.75 |
| US-KS1 | ENF | 2002-2002 | 28.46 | -80.67  |
| US-KS2 | CSH | 2003-2006 | 28.61 | -80.67  |
| US-Lin | CRO | 2009-2010 | 36.36 | -119.09 |
| US-Los | WET | 2000-2014 | 46.08 | -89.98  |
| US-Me1 | ENF | 2004-2005 | 44.58 | -121.50 |
| US-Me2 | ENF | 2002-2014 | 44.45 | -121.56 |
| US-Me3 | ENF | 2004-2009 | 44.32 | -121.61 |
| US-Me5 | ENF | 2000-2002 | 44.44 | -121.57 |
| US-Me6 | ENF | 2010-2014 | 44.32 | -121.61 |
| US-MMS | DBF | 1999-2014 | 39.32 | -86.41  |
| US-Myb | WET | 2010-2014 | 38.05 | -121.77 |
| US-Ne1 | CRO | 2001-2013 | 41.17 | -96.48  |
| US-Ne2 | CRO | 2001-2013 | 41.16 | -96.47  |
| US-Ne3 | CRO | 2001-2013 | 41.18 | -96.44  |
| US-NR1 | ENF | 1998-2014 | 40.03 | -105.55 |
| US-Oho | DBF | 2004-2013 | 41.55 | -83.84  |
| US-ORv | WET | 2011-2011 | 40.02 | -83.02  |
| US-PFa | MF  | 1995-2014 | 45.95 | -90.27  |
| US-Prr | ENF | 2010-2014 | 65.12 | -147.49 |
| US-SRC | OSH | 2008-2014 | 31.91 | -110.84 |
| US-SRG | GRA | 2008-2014 | 31.79 | -110.83 |
| US-Sta | OSH | 2005-2009 | 41.40 | -106.80 |
| US-Syv | MF  | 2001-2014 | 46.24 | -89.35  |
| US-Ton | WSA | 2001-2014 | 38.43 | -120.97 |
| US-Tw1 | WET | 2012-2014 | 38.11 | -121.65 |
| US-Tw3 | CRO | 2013-2014 | 38.12 | -121.65 |
| US-Tw4 | WET | 2013-2014 | 38.10 | -121.64 |
| US-Twt | CRO | 2009-2014 | 38.11 | -121.65 |

|        |     |           |        |         |
|--------|-----|-----------|--------|---------|
| US-Var | GRA | 2000-2014 | 38.41  | -120.95 |
| US-WCr | DBF | 1999-2014 | 45.81  | -90.08  |
| US-Whs | OSH | 2007-2014 | 31.74  | -110.05 |
| US-Wi0 | ENF | 2002-2002 | 46.62  | -91.08  |
| US-Wi1 | DBF | 2003-2003 | 46.73  | -91.23  |
| US-Wi3 | DBF | 2002-2004 | 46.63  | -91.10  |
| US-Wi4 | ENF | 2002-2005 | 46.74  | -91.17  |
| US-Wi5 | ENF | 2004-2004 | 46.65  | -91.09  |
| US-Wi6 | OSH | 2002-2003 | 46.62  | -91.30  |
| US-Wi7 | OSH | 2005-2005 | 46.65  | -91.07  |
| US-Wi8 | DBF | 2002-2002 | 46.72  | -91.25  |
| US-Wi9 | ENF | 2004-2005 | 46.74  | -91.07  |
| US-Wkg | GRA | 2004-2014 | 31.74  | -109.94 |
| US-WPT | WET | 2011-2013 | 41.46  | -83.00  |
| ZM-Mon | DBF | 2000-2009 | -15.44 | 23.25   |

---



**Table S2.** Model codes and their corresponding predictors.

| Model Code | VI <sub>s</sub> | CO <sub>2</sub> | PFT | Plant<br>Traits | Climate<br>Factors |
|------------|-----------------|-----------------|-----|-----------------|--------------------|
| V          | √               |                 |     |                 |                    |
| VC         | √               | √               |     |                 |                    |
| VP         | √               |                 | √   |                 |                    |
| VCP        | √               | √               | √   |                 |                    |
| VCT        | √               | √               |     | √               |                    |
| VCPT       | √               | √               | √   | √               |                    |
| VCF        | √               | √               |     |                 | √                  |
| VCPF       | √               | √               | √   |                 | √                  |
| VCTF       | √               | √               |     | √               | √                  |
| VCPTF      | √               | √               | √   | √               | √                  |
